# Supplementary material for: Anterior expansion and posterior addition to the notochord mechanically coordinate zebrafish embryo axis elongation
Source: PubMed Central journal article supplement (PMC8327291; doi:10.1242/dev.199459), 2021-07-21
Supplement: develop-148-199459-s1.pdf [file develop-148-199459-s1.pdf]

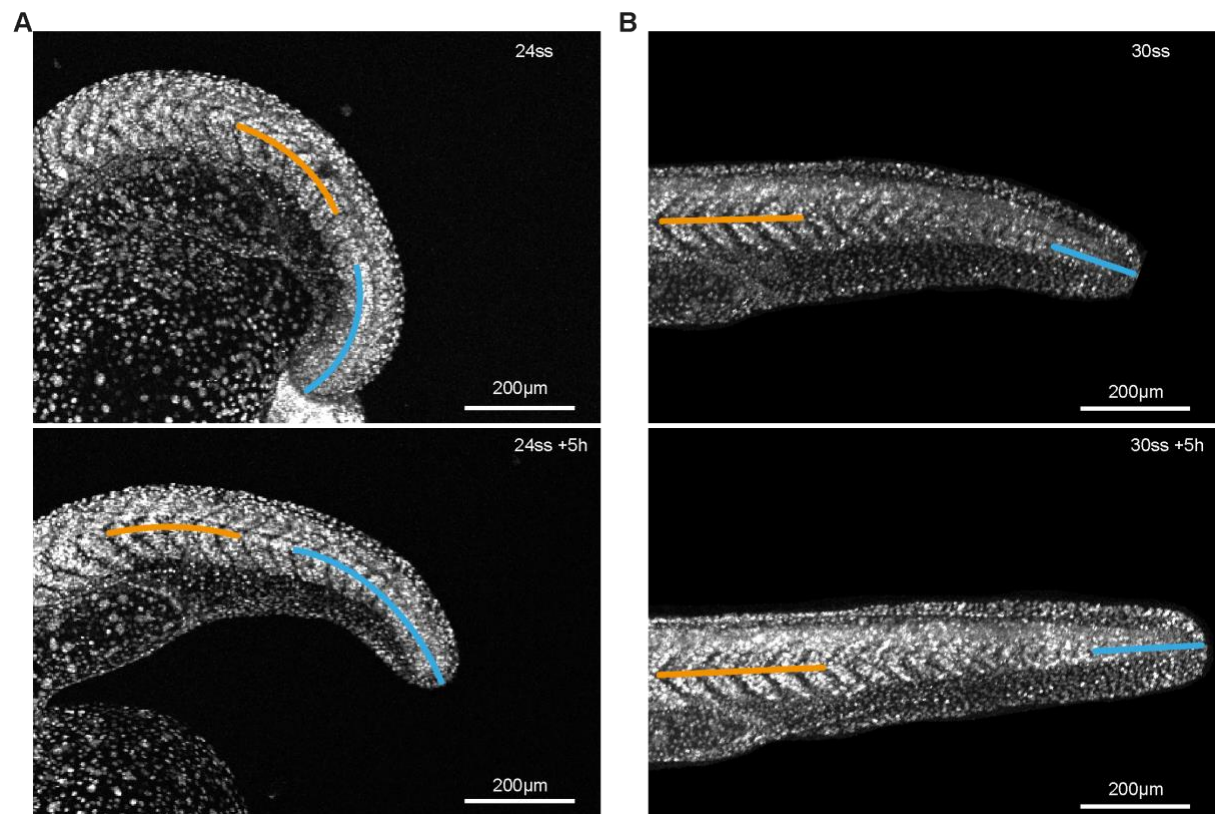

**Fig. S1. Segmentation-associated and segmented tissue elongation during tailbud and post-tailbud stages of development.**

(A) A live zebrafish embryo expressing NLS-KikGR at the 24-somite stage and 5 hours later.

(B) A live zebrafish embryo expressing NLS-KikGR at approximately the 30-somite stage and 5 hours later.

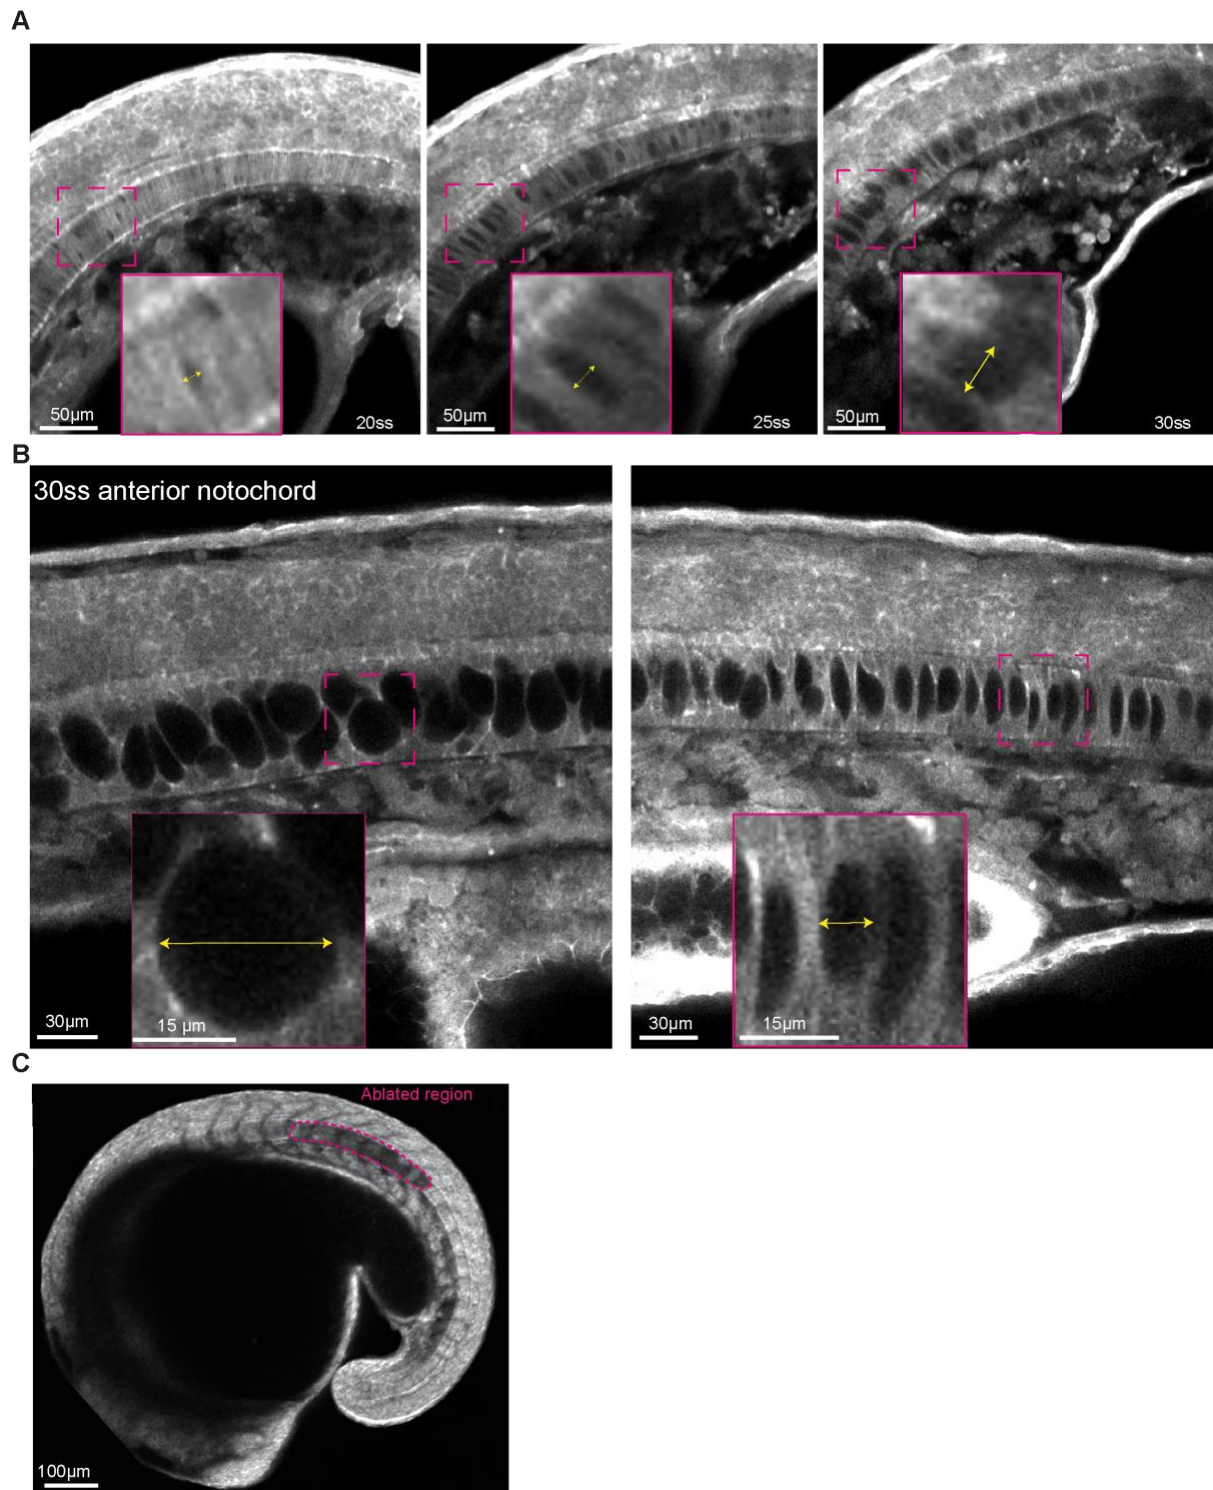

**Fig. S2. Notochord cell expansion progresses temporally and spatially along the axis.**

- (A) Notochord cells in an equivalent region of a Lifact-GFP expressing embryo at 20, 25, and 30-somite stages. Yellow arrows indicate direction in which length measurements were taken.
- (B) Notochord cells in the anterior and posterior of a Lifact\_GFP expressing embryo. Yellow arrows indicate direction in which length measurement was taken.
- (C) An anterior notochord ablation in a lifact-GFP expressing embryo near the onset of vacuolation. Embryos were ablated at 18 somite stage.

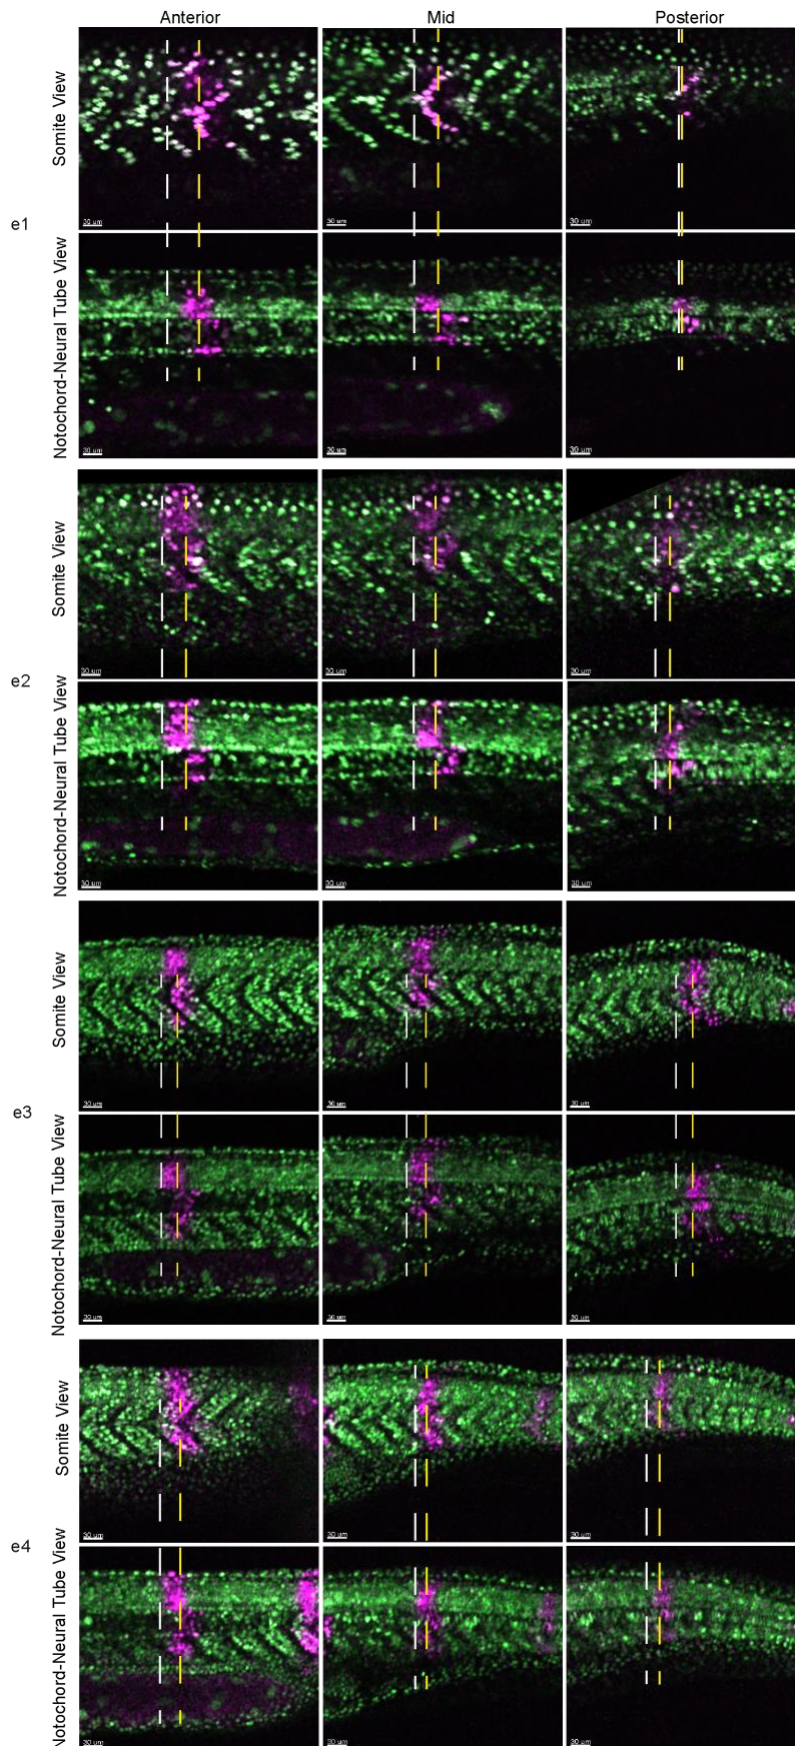

**Fig. S3. Notochord and somite label at different regions along the axis in post-tailbud stage embryos.** Images showing the anterior extent of notochord (yellow-line) and somite (white-line) photolabels used to measure the shift between tissues over a 5-hour period.

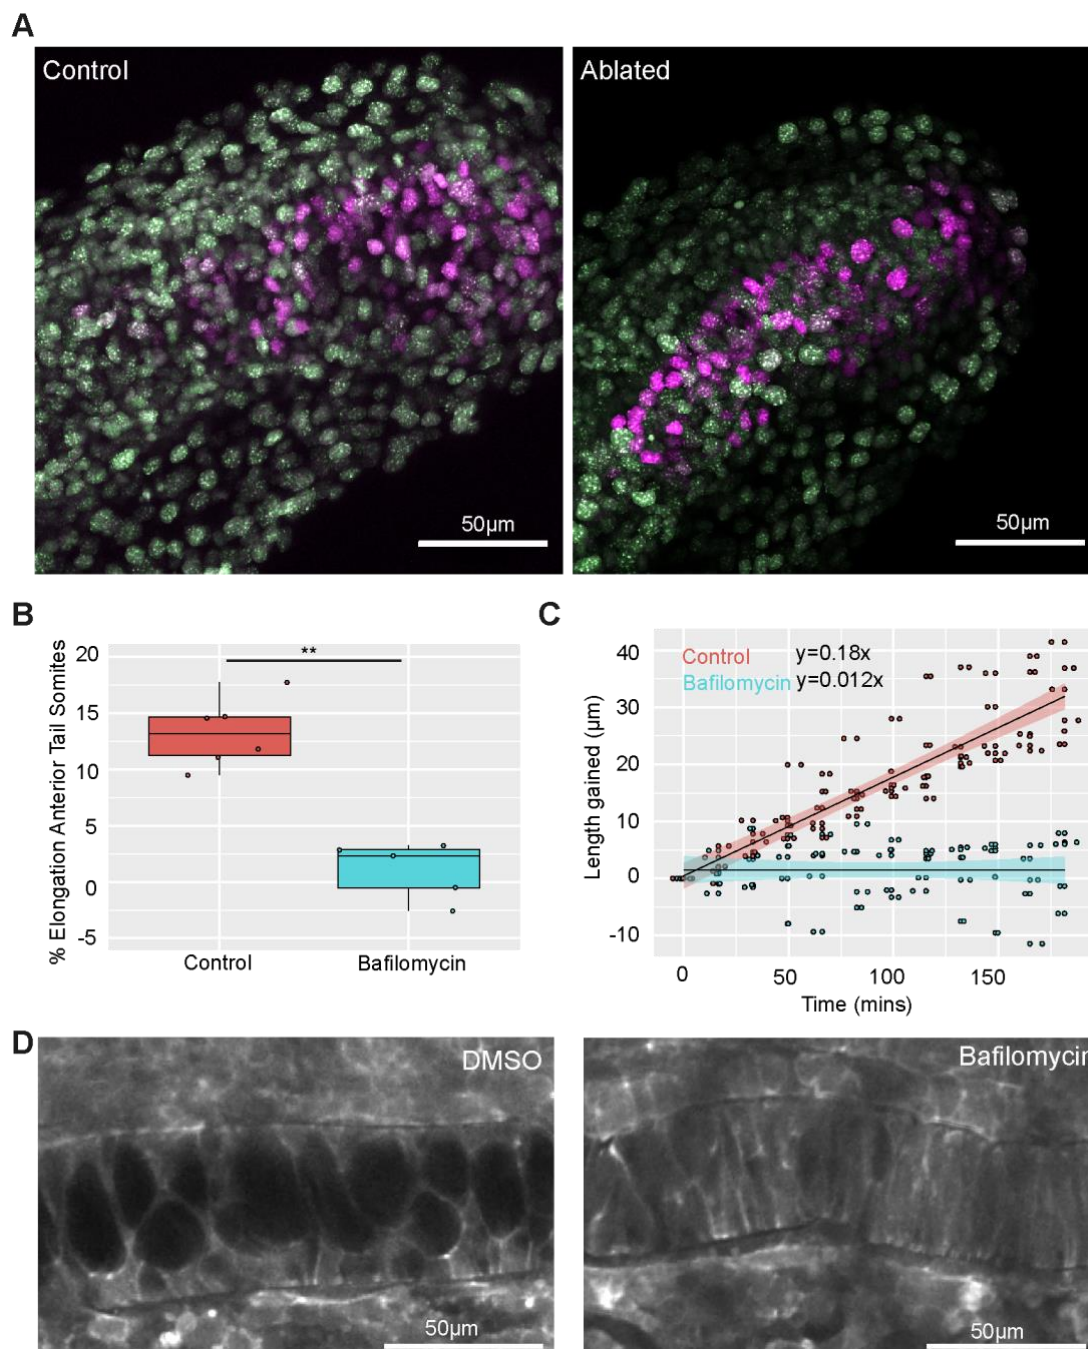

**Fig. S4. Disrupted notochord cell expansion impacts segmented tissue-associated, not unsegmented tissue-associated elongation.**

- (A) Photolabels of presomitic mesoderm progenitors in control and ablated embryos imaged 4 hours after the time of labelling. (n=4 control and n=5 ablated embryos).
- (B) Percentage elongation of a 5-somite region over a 3-hour period in DMSO and Bafilomycin treated post-tailbud stage embryos (n=6 control and n=5 Bafilomycin treated embryos,  $p < 0.01$ ).
- (C) Length gained in a 5-somite region over time in DMSO and Bafilomycin treated embryos (n=6 control and n=5 Bafilomycin treated embryos).
- (D) Images of the notochord in DMSO and Bafilomycin treated Lifeact-GFP expressing embryos.

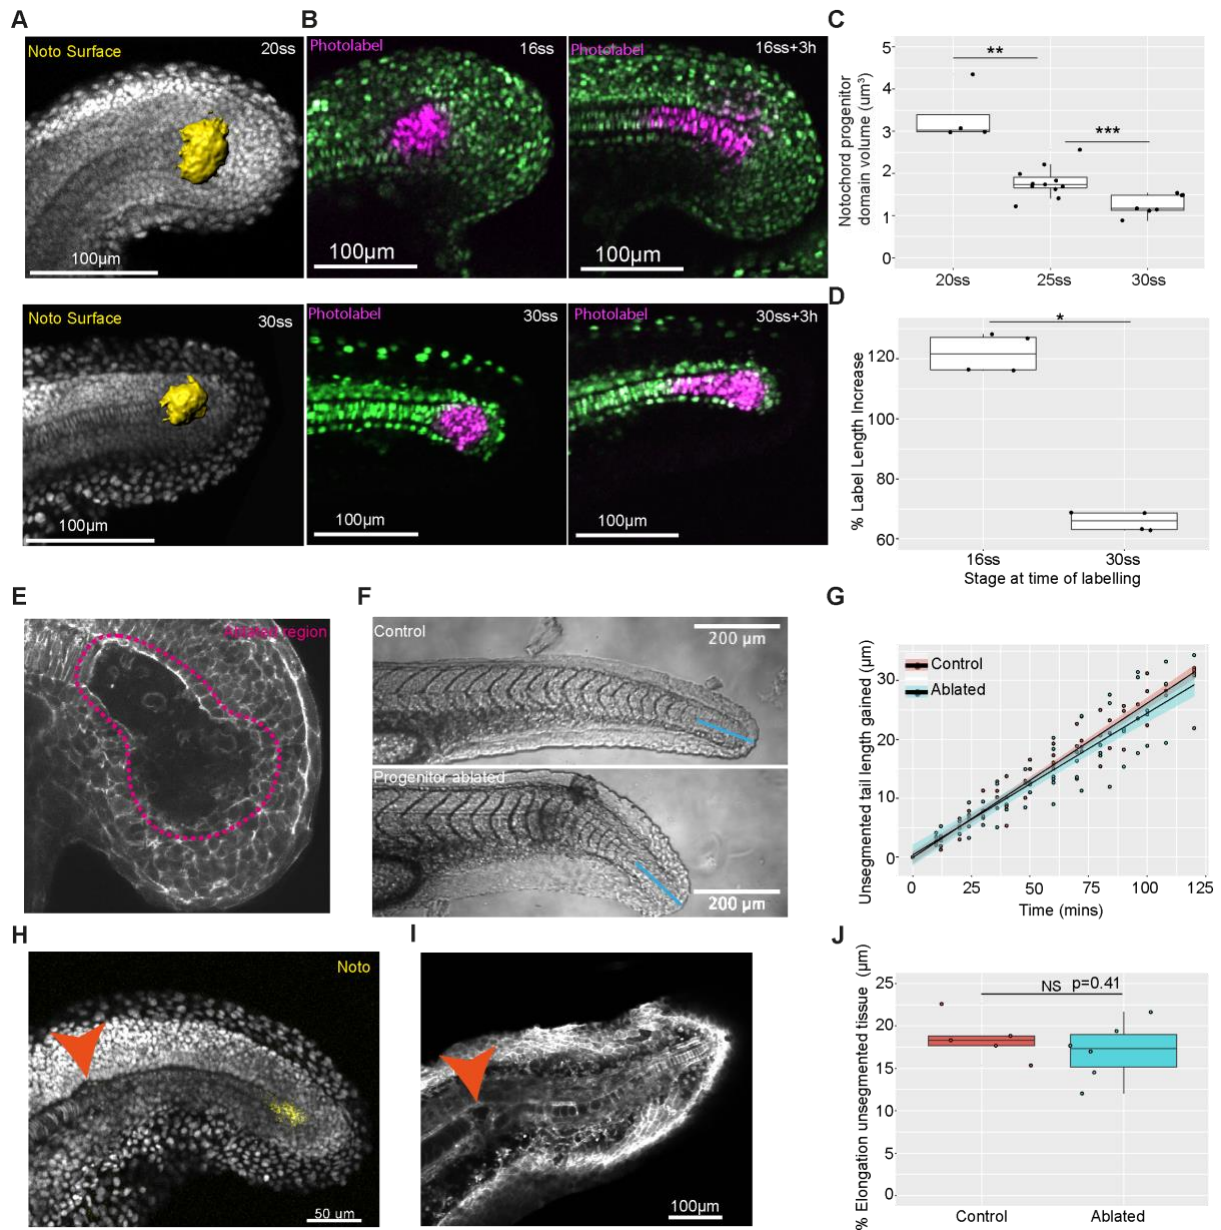

**Fig. S5. Notochord progenitors recover after ablation and re-form the posterior notochord.**

- (A) 3D surfaces of the notochord progenitor domain generated using *Noto* gene expression in 20 and 30 somite stage embryos.
- (B) Notochord progenitor photolabels in 16 and 30 somite stage embryos with corresponding images taken 3 hours after labelling.
- (C) Notochord progenitor domain volume in 20, 25 and 30 somite stage embryos (n=5, n=13, n=7 embryos respectively, p<0.01, p<0.001 respectively).
- (D) Photolabel AP length increase over 3 hours in 16 and 30 somite stage embryos (n=4 embryos per stage, p<0.05).
- (E) Representative image of a 16-somite stage embryo with notochord progenitors ablated.
- (F) Representative images of control and progenitor ablated post-tailbud stage embryos. The blue line indicates the region of residual unsegmented tissue tracked over time.
- (G) Length gain in a small region of unsegmented tissue over time in control and progenitor ablated post-tailbud stage embryos (n=6 control and n=7 ablated embryos).
- (H) Representative image of an embryo fixed approximately 5 hours after notochord progenitor ablation. The gene expression marker '*Noto*' marks the notochord progenitors.
- (I) Representative image of an embryo imaged approximately 24 hours after notochord progenitor ablation. The recovered notochord is visualised using a lifeact-GFP reporter.
- (J) Percentage elongation of unsegmented tissue in the tail region after recovery from notochord progenitor ablation over approximately 100 minutes (n=5 control and n=6 ablated embryos, p=0.41). Orange arrows indicate the internalised ablated tissue.

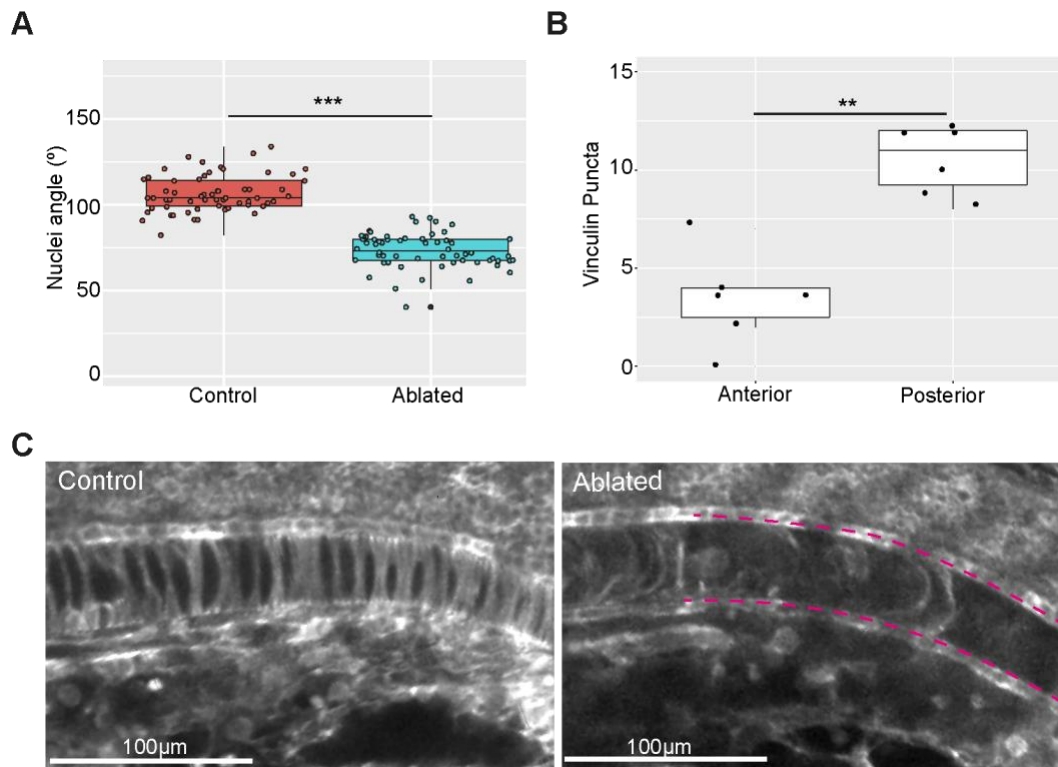

**Fig. S6. Unexpanded posterior notochord cells resist anterior cell expansion.**

- (A) Angles between dorsally located nuclei and the notochord AP axis (°) in control and ablated embryos (n=12 embryos per condition, 5 angles measured per embryo,  $p < 0.001$ ).
- (B) The number of vinculin puncta present at a notochord-ECM sheath interface in the anterior and posterior (n=3 embryos, 2 interfaces measured per embryo).
- (C) Notochord cells located close to the end of the yolk extension in Lifeact-GFP expressing control and posteriorly-ablated embryos (magenta lines).

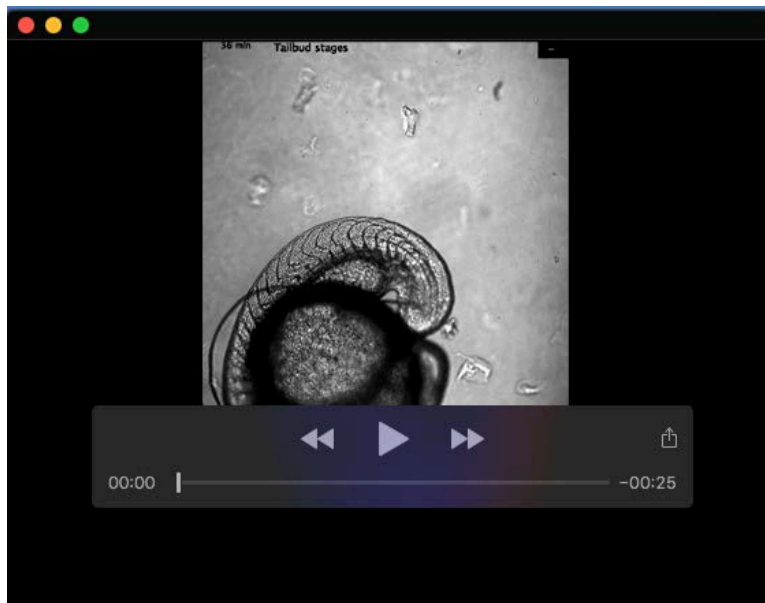

**Movie 1. Tailbud and post-tailbud stages of development.** A brightfield movie showing embryos transitioning from tailbud to post-tailbud stages of elongation. Time is in minutes.

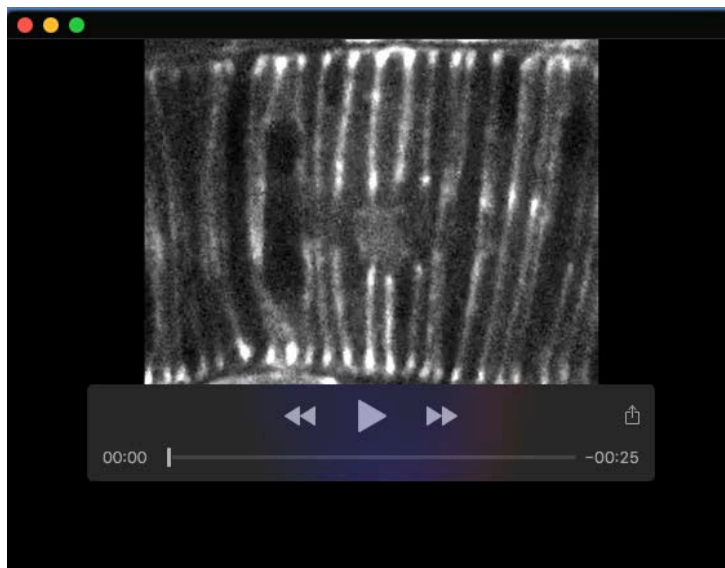

**Movie 2. Notochord cell ablation.** Multi-photon ablation of notochord cells in a lifeact-GFP expressing embryo.

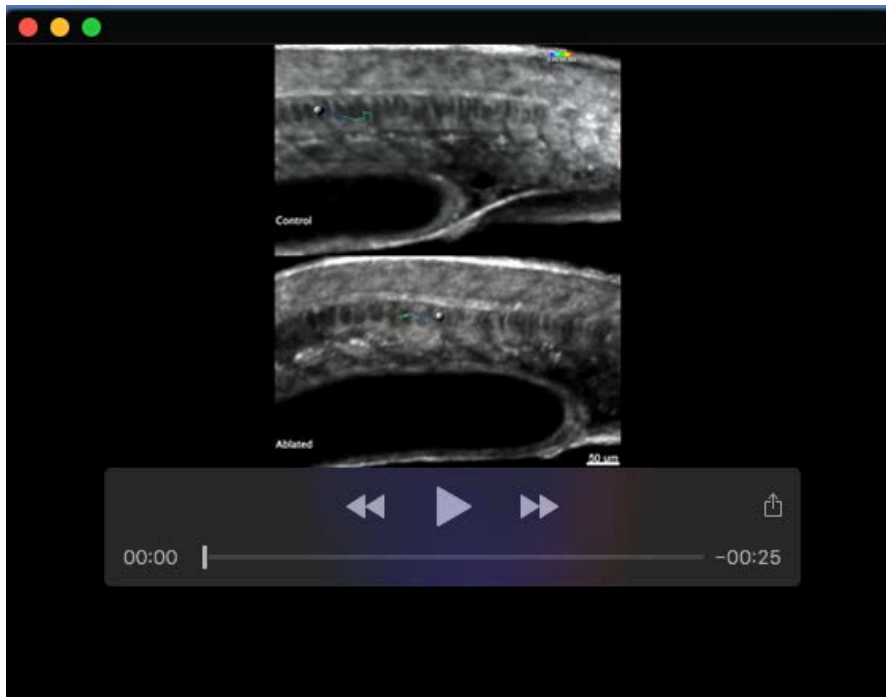

**Movie 3. Vacuolated cell movement in control and anterior-ablated embryos.** Movement of expanding vacuolated cells in a control embryo and an embryo with an anterior notochord ablation. Time is in hours.

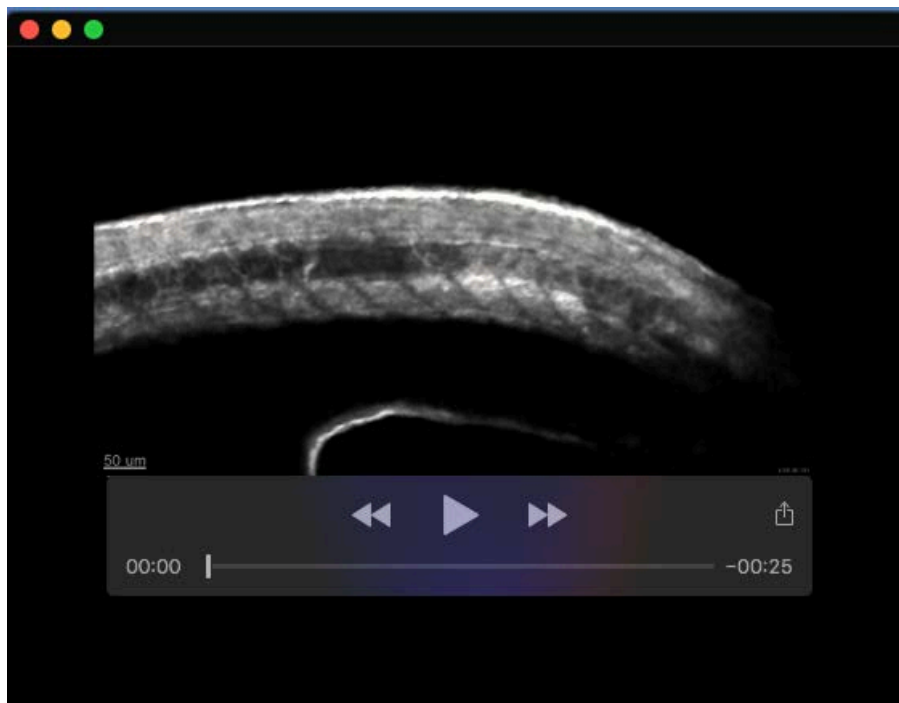

**Movie 4. Vacuolated cells move into the ablated space.** Movement of expanding vacuolated cells on either side of an anterior notochord ablation. Time is in hours.



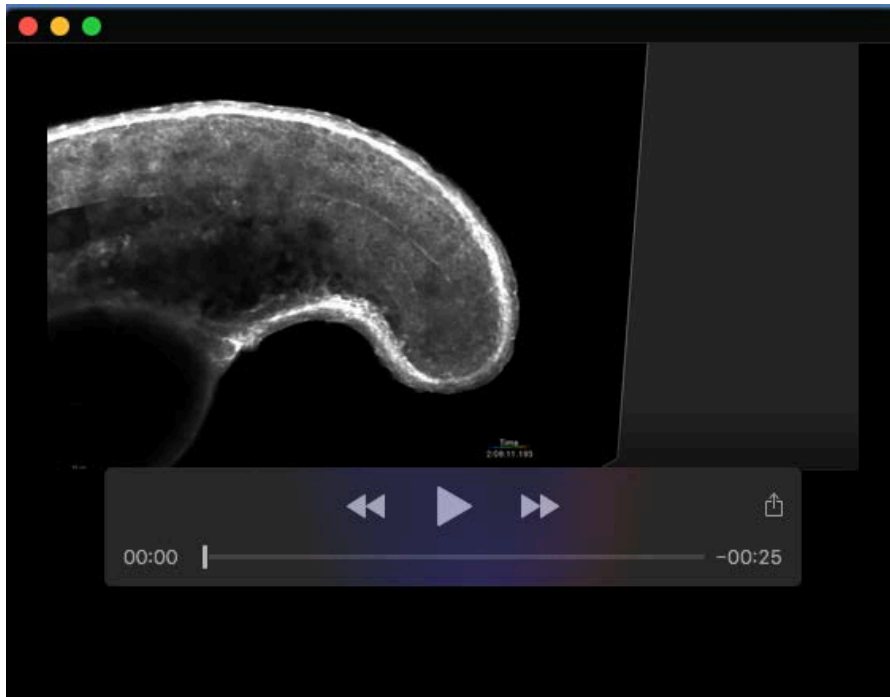

**Movie 5. Segmentation-associated elongation is robust to notochord perturbation.** Posterior tail elongation in an embryo with an ablation extending into the posterior notochord. Time is in hours.

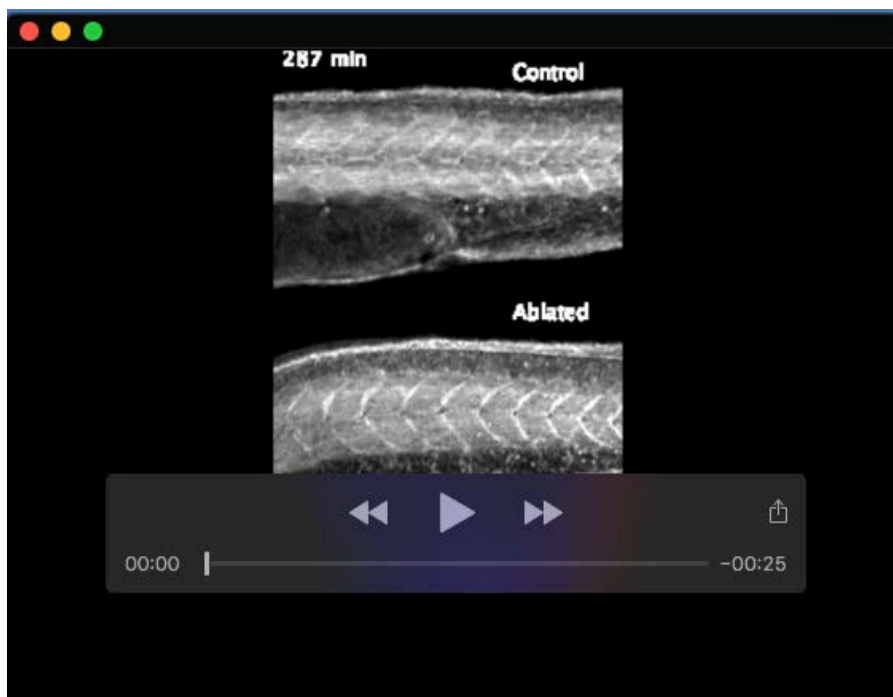

**Movie 6. Segmented tissue elongation is decreased in embryos with disrupted notochord cell expansion.** Elongation of a region of 5 somites in a control and ablated embryo. Time is in minutes.

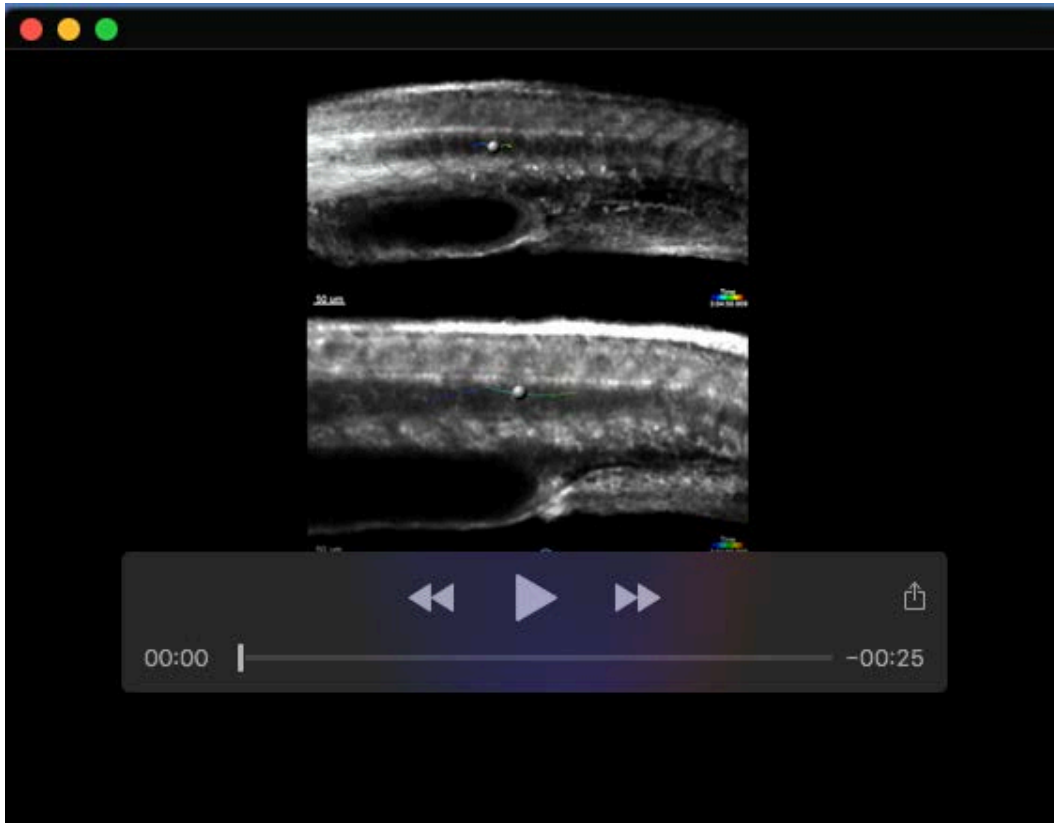

**Movie 7. Vacuolated cells move faster when posterior unexpanded cells are removed.** Movement of expanding vacuolated cells in a control embryo and an embryo with a posterior notochord ablation. Time is in hours.
